# Supplementary material for: Functional Characterization of the MsFKF1 Gene Reveals Its Dual Role in Regulating the Flowering Time and Plant Height in Medicago sativa L
Source: MDPI journal article supplement (doi:10.3390/plants13050655), 2024-02-27
Supplement: s1 [file s1]

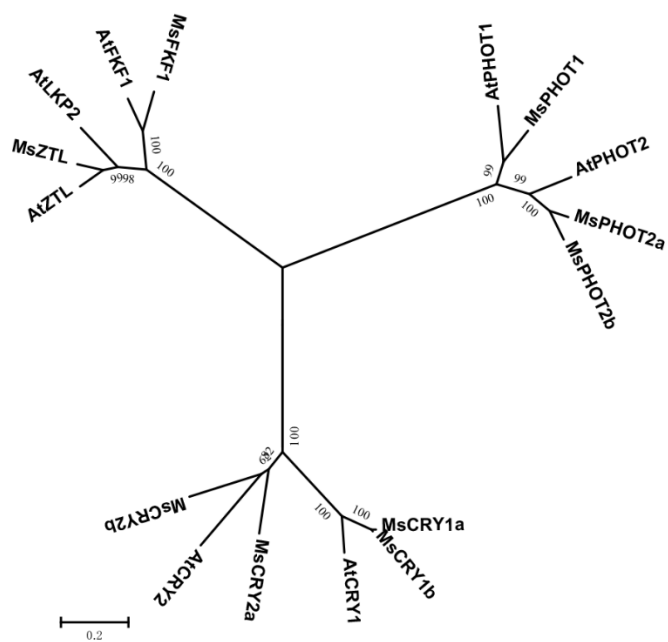

**Figure S1. Phylogenetic analysis of blue light receptor proteins of *Medicago* and *Arabidopsis*.** A phylogenetic tree was generated using the maximum likelihood method. FKF1 showed greater similarity to ZTL and LKP2 compared to the other four blue-light receptors (CRY1, CRY2, PHOT1, and PHOT2).

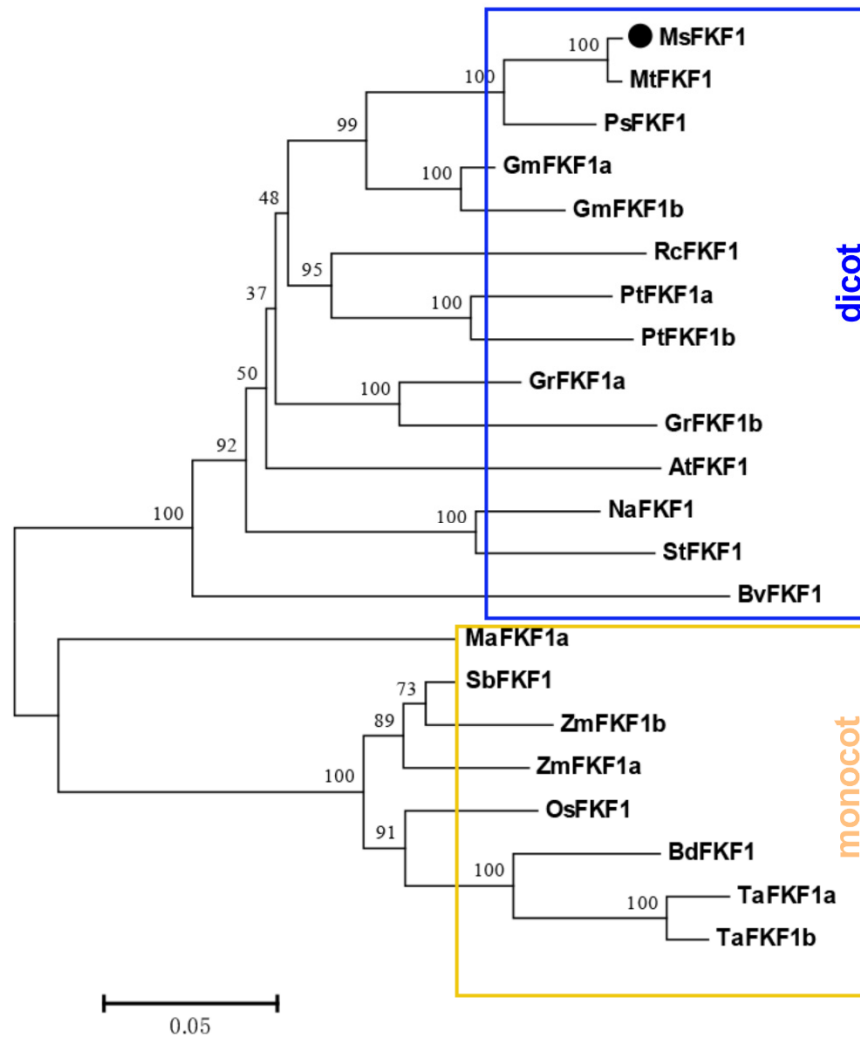

**Figure S2. Phylogenetic analysis of MsFKF1 and its orthologs.**

The phylogenetic tree was generated through the utilization of the neighbor-joining method, following sequence alignment conducted with the Clustal W program. The branch numbers present on the tree represent the percentage of replicates that provide support for each specific branch, as determined by implementing the bootstrap method with 1000 replicates. The scale bar depicted on the tree corresponds to a measurement of 0.05 amino acid substitutions per residue. The accession numbers of the proteins employed in constructing the phylogenetic tree can be found in Table S1.

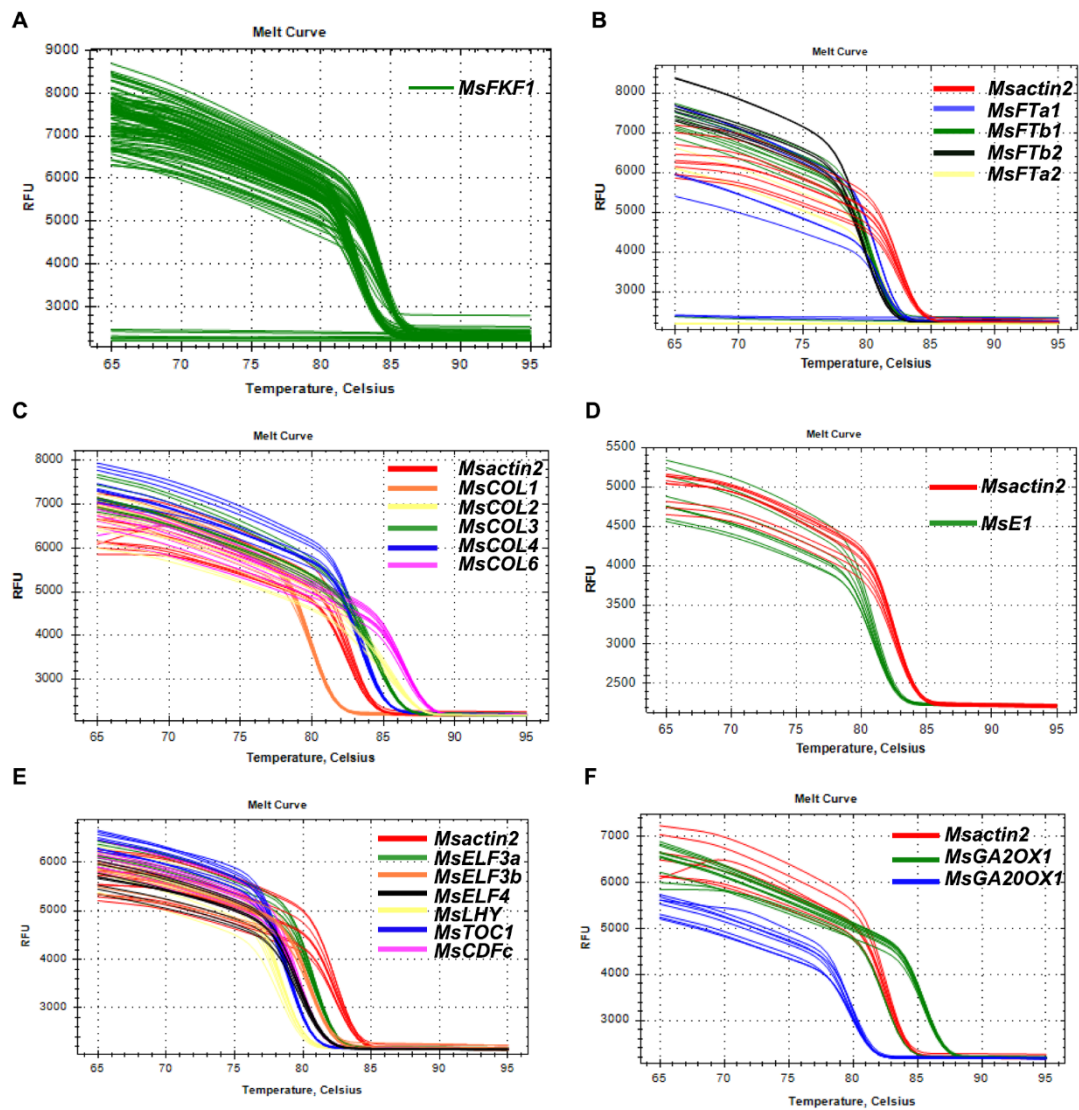

**Figure S3. The melting curve diagram of RT-qPCR primers used in this study.**

(A) The melting curve diagram of the MsFKF1 primer is used to analyze the effect of photoperiod on the expression level of MsFKF1. (B) The melting curve diagram of the RT-qPCR for alfalfa *flower locus T* gene primers. (C-E) The melting curve diagram of the RT-qPCR for Flowering time related genes primers. (F) the melting curve diagram of the RT-qPCR for GA biosynthesis related genes primers.

**Table S1.** Sequence homology of FKF1 proteins in the indicated species.

| Gene    | Homology matrix              |
|---------|------------------------------|
| MsFKF1  | 100%                         |
| MtFKF1  | 99.3% 100%                   |
| GmFKF1a | 90.4% 90.2% 100%             |
| AtFKF1  | 81.5% 81.5% 82.8% 100%       |
| ZmAGO3  | 72.9% 72.7% 73.2% 71.2% 100% |

**Table S2.** Comparison of the exon/intron composition of FKF1 in the indicated species.

| Species                        | Gene symbol | Accession numbers     | CDS (bp) | amino acid (a.a.) | extron 1 length (bp) | intron length (bp) | extron 2 length (bp) |
|--------------------------------|-------------|-----------------------|----------|-------------------|----------------------|--------------------|----------------------|
| <i>Medicago sativa</i>         | MsFKF1      | Msa0930760            | 1911     | 636               | 384                  | 677                | 1942                 |
| <i>Medicago truncatula</i>     | MtFKF1      | MTR_8g105590          | 2328     | 635               | 384                  | 677                | 1942                 |
| <i>Pisum sativum</i>           | PsFKF1      | Psat7g007600          | 2453     | 610               | 447                  | 359                | 2004                 |
| <i>Glycine max</i>             | GmFKF1a     | Glyma05g239400        | 2400     | 620               | 517                  | 992                | 1883                 |
|                                | GmFKF1b     | Glyma08g046500        | 2252     | 647               | 377                  | 1040               | 1875                 |
| <i>Rosa chinensis</i>          | RcFKF1      | RchiOBHm_Ch4g0442801  | 2354     | 631               | 464                  | 822                | 1888                 |
| <i>Nicotiana attenuata</i>     | NaFKF1      | A4A49_16690           | 2307     | 634               | 326                  | 4548               | 1981                 |
| <i>Gossypium raimondii</i>     | GrFKF1a     | B456_002G166800       | 2392     | 629               | 416                  | 1892               | 1974                 |
|                                | GrFKF1b     | B456_008G168500       | 2301     | 627               | 376                  | 704                | 1923                 |
| <i>Arabidopsis thaliana</i>    | AtFKF1      | At1g68050.1           | 2168     | 619               | 369                  | 100                | 1797                 |
| <i>Beta vulgaris</i>           | BvFKF1      | BVRB_6g154770         | 2322     | 633               | 490                  | 5653               | 1832                 |
| <i>Populus trichocarpa</i>     | PtFKF1a     | Potri.010G105700.v4.1 | 2442     | 627               | 300                  | 411                | 3240                 |
|                                | PtFKF1b     | Potri.008G135200.v4.1 | 2532     | 637               | 454                  | 1147               | 2076                 |
| <i>Solanum tuberosum</i>       | StFKF1      | PGSC0003DMT400051416  | 2239     | 634               | 343                  | 2358               | 1896                 |
| <i>Sorghum bicolor</i>         | SbFKF1      | SORBI_3005G145300     | 2111     | 594               | 197                  | 1785               | 1914                 |
|                                | ZmFKF1a     | GRMZM2G107945         | 2582     | 629               | 494                  | 8694               | 2086                 |
| <i>Zea mays</i>                | ZmFKF1b     | GRMZM2G106363         | 2367     | 618               | 422                  | 743                | 1945                 |
|                                | TaFKF1a     | TraesCS4A02G164000    | 2320     | 626               | 437                  | 862                | 1883                 |
| <i>Triticum aestivum</i>       | TaFKF1b     | TraesCS4B02G157500    | 2191     | 620               | 300                  | 843                | 1891                 |
| <i>Brachypodium distachyon</i> | BdFKF1      | KQJ88263              | 2330     | 621               | 423                  | 1529               | 1907                 |
| <i>Oryza sativa</i>            | OsFKF1      | Os11g34460            | 2190     | 630               | 397                  | 2651               | 1791                 |
| <i>Musa acuminata</i>          | MaFKF1a     | Ma07_g10990           | 2358     | 616               | 519                  | 1609               | 1839                 |

**Table S3.** Cis-element of the MsFKF1 promoter.

| Name        | Cis element | Number | Description                    |
|-------------|-------------|--------|--------------------------------|
| circadian   | CAAAGATATC  | 1      | circadian control              |
| GT1-motif   | GGTTAA      | 2      | light responsiveness           |
| G-box       | CACGA/TC    | 3      | light responsiveness           |
| TCT-motif   | TCTTAC      | 1      | light responsiveness           |
| ATCT-motif  | AATCTAATCC  | 2      | light responsiveness           |
| Box 4       | ATTAAT      | 1      | light responsiveness           |
| GATA-motif  | GATAGGA     | 1      | light responsiveness           |
| ABRE        | ACGTG       | 2      | abscisic acid responsiveness   |
| CGTCA-motif | CGTCA       | 3      | MeJA-responsiveness            |
| TGACG-motif | TGACG       | 3      | MeJA-responsiveness            |
| CAT-box     | GCCACT      | 2      | related to meristem expression |

Note: The *MsFKF1* promoter sequence was extracted from 2000 bp upstream of the start codon (ATG) in the assembled genome of *Zhongmu*

No. 4.

**Table S4.** Primers used in this study.

| Name            | Popups                   | Forward (5' → 3')                               | Reverse (5' → 3')                            |
|-----------------|--------------------------|-------------------------------------------------|----------------------------------------------|
| MsFKF1          | clone                    | GAAAATTATTGTACTCCACGG                           | CGGTTCAAGTTGATTTTCATAAGT                     |
| Homo-FKF1       | Overexpression and GFP   | CTCTAGAGTTAACCGGGCTCAG<br>ATGTGTGGCATTCTCAGCT   | CCTCAGAAATCAACTTTTGCTC<br>CATGTCAGAGTCTTGTCG |
| BD-FKF1         | Assemble clone to PGBKT7 | atatggccatggaggccgaattcATGTGTGG<br>CATTCTTCAGCT | aggtcgacggatccccgggaattTCACATG<br>TCAGAGTCTT |
| qMsFKF1         | qPCR                     | CAGGTCTTCATTACCGTCTC                            | ACTCATTCAAGCACCCATTCC                        |
| qMsFTa1         | qPCR                     | TCAGAAACCTCAACACCCTAGTT<br>A                    | CCTGGAATATCAGTCACCAACC<br>AG                 |
| qMsFTa2         | qPCR                     | ACCCAACAACCTTCTACACCCTG                         | AATCCCTAAATTGGGTCTGGCT                       |
| qMsFTb1         | qPCR                     | GACTACAGGGACAACCTTCGGAG                         | GCCATCCAGGAGCTAATATAGTG<br>A                 |
| qMsFTb2         | qPCR                     | GGGGACAACGTTCCGGAC                              | CGCCATCCTGGAGCTAATATATT<br>G                 |
| qMsE1           | qPCR                     | TCTTGTGATGAAGCCTCTAC                            | TATCCCTTGTTGTCGTGT                           |
| qMsCOL1         | qPCR                     | CTTGGGTTGGAGTTTGAGTC                            | TGTTCTTTTGGAGGTCTTG                          |
| qMsCOL2         | qPCR                     | TCTCCAAACTCCTTCAAACC                            | TACAACTCCAACCTCCATCG                         |
| qMsCOL3         | qPCR                     | GAATCCAACACTTCTCACTCTG                          | TCCTCTTCTCCCTATACCTCA                        |
| qMsCOL4         | qPCR                     | GGTGTGAATAGTAACCAAGGGAT                         | CATAGATGAAGGAAGTGGGAGA                       |
| qMsCOL6         | qPCR                     | TTCCCGTGTGACTATTGCG                             | AAAGATGAAGAGGTGGGGTT                         |
| qMsELF4         | qPCR                     | AGTTTCAGGCAGGTTCACTCG                           | CTTCACCATATTATCAGGCATTCT                     |
| <i>qMsELF3a</i> | qPCR                     | AAAGGGATCTAAACAATCTGCG                          | TTGGCTTGCTTACTGAGGTGTC                       |
| <i>qMsELF3b</i> | qPCR                     | CCAGCGAGGCAAGCTAAGAA                            | CCATTGTAGTGTAAGGAGGC                         |
| <i>qMsLHY</i>   | qPCR                     | GAGGAGCATAAAGATGAGGAAA<br>G                     | CCGAAGATACAGATGAACAAGG                       |
| <i>qMsTOC1</i>  | qPCR                     | AGCAAGAGTGGTGATGGATTCA                          | TGCCGTGCGGATTTTACAGA                         |
| qMsCDFc         | qPCR                     | CTTCATCTCCCTCTTCTTCTCCA                         | AGGCTCCATCGTCTTGTGCT                         |
| qMsGA20ox1      | qPCR                     | GAATGAGCCTTGGAGTTGG                             | TGGAATGCCATTGATCGTC                          |
| qMsGA20ox1      | qPCR                     | TCCCTGCTTTTGGTAAAGAT                            | GGACAAGGGGGATAATGGTTG                        |
